# Supplementary material
Source: MDPI journal article supplement (https://www.mdpi.com/1424-2818/15/4/473)
Supplement: s1 [file s1]

**Table S1.** Details of the analysed *Trifolium fragiferum* populations.

| Accession            | Associated water reservoir         | Habitat                          | Location                                                                 | Coordinates            |
|----------------------|------------------------------------|----------------------------------|--------------------------------------------------------------------------|------------------------|
| TF1                  | Lake Liepājas                      | Salt-affected wet shore meadow   | City of Liepāja, Latvia                                                  | 56°29'29"N, 21°1'38"E  |
| TF2                  | River Lielupe                      | Salt-affected shore meadow       | City of Jūrmala, Lielupe, River Lielupe Estuary, Latvia                  | 57°0'11"N, 23°55'56"E  |
| TF2b                 | River Lielupe                      | Shore meadow                     | City of Jūrmala, Majori, Latvia                                          | 56°57'29"N, 23°49'11"E |
| TF3                  | River Buļļupe                      | Shore meadow                     | City of Rīga, Kurzeme District, Island of Buļļu Sala, Vakarbuļļi, Latvia | 56°59'53"N, 23°57'21"E |
| TF4                  | —                                  | Degraded urban land              | City of Rīga, Vidzeme Suburb, Latvia                                     | 56°57'46"N, 24°7'2"E   |
| TF5                  | The Gulf of Riga of the Baltic Sea | Salt-affected wet coastal meadow | Salacgrīva Parish, Randu Meadows, Latvia                                 | 57°49'51"N, 24°20'12"E |
| TF6                  | The Gulf of Riga of the Baltic Sea | Salt-affected wet coastal meadow | Salacgrīva Parish, Randu Meadows, Latvia                                 | 57°50'9"N, 24°20'15"E  |
| TF7                  | The Gulf of Riga of the Baltic Sea | Dry coastal meadow               | Town of Ainaži, Latvia                                                   | 57°52'8"N, 24°21'10"E  |
| TF8, cv. 'Palestine' | NA                                 | NA                               | NA                                                                       | NA                     |
| TF9                  | The Baltic Sea                     | Salt-affected wet coastal meadow | Hammeren, Bornholm, Denmark                                              | 55°17'54"N 14°46'17"E  |
| TF10                 | The Baltic Sea                     | Salt-affected coastal meadow     | Haapsalu, Estonia                                                        | 58°57'15"N 23°31'15"E  |
